# Supplementary material for: Multicomponent sulfides as narrow gap hydrogen evolution photocatalysts
Source: Royal Society of Chemistry journal article supplement (doi:10.1039/c0cp00267d), 2010-01-01
Supplement: c0cp00267d.pdf [file c0cp00267d.pdf]

## Supporting information

### Multicomponent Sulfides as Narrow Gap Hydrogen Evolution Photocatalysts

Shigeru Ikeda,\* Takayuki Nakamura, Takashi Harada, and Michio Matsumura

Research Center for Solar Energy Chemistry, Osaka University, 1-3 Machikaneyama,  
Toyonaka, Osaka 560-8531, Japan

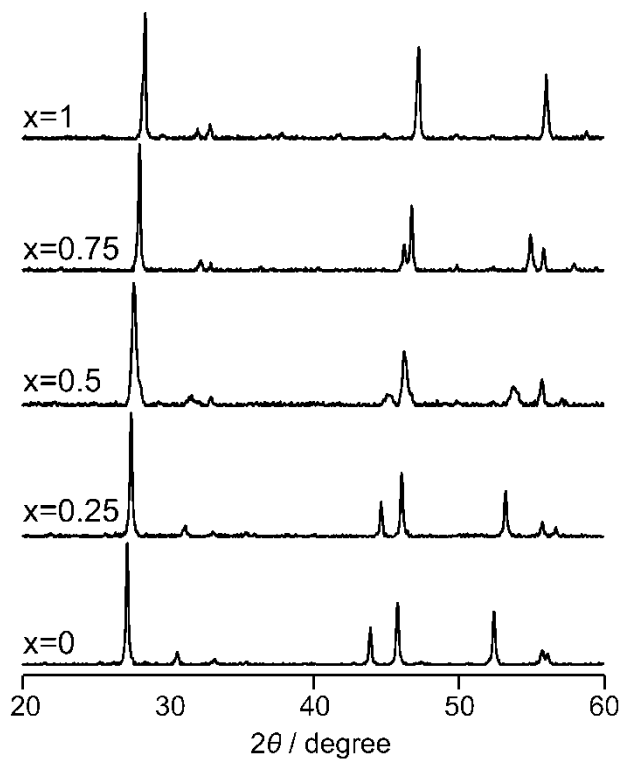

**Figure S1.** XRD patterns of  $((\text{Cu}_x\text{Ag}_{1-x})_2\text{ZnSnS}_4)_{0.95}(\text{ZnS})_{0.2}$  solid solutions with various  $x$  values.

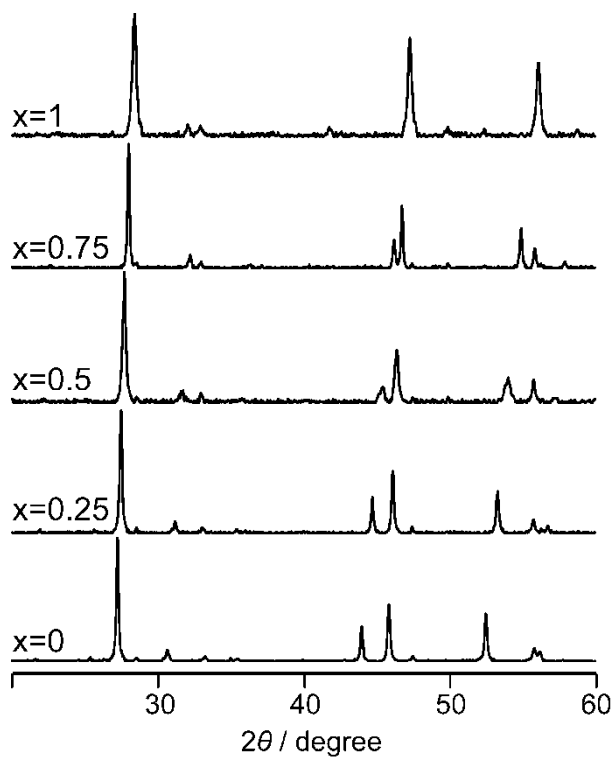

**Figure S2.** XRD patterns of  $((\text{Cu}_x\text{Ag}_{1-x})_2\text{ZnSnS}_4)_{0.9}(\text{ZnS})_{0.4}$  solid solutions with various  $x$  values.
